# Supplementary material for: Evolving Information Needs among Colon, Breast, and Prostate Cancer Survivors: Results from a Longitudinal Mixed-Effects Analysis
Source: Oxford University Press journal article supplement (doi:10.1158/1055-9965.epi-15-0041), 2015-05-15
Supplement: 10559965epi150041-sup-143852_2_supp_2936713_nmrbzn.docx [file 10559965epi150041-sup-143852_2_supp_2936713_nmrbzn.docx]

**Supplementary Table 2 – Adjusted odds ratios (mixed effects logistic model) of information seeking about cancer survivorship topics (excluded patients with Stage IV disease)**

|  | Cancer coming back | | Getting a different cancer | | Family members getting the same cancer | | Family members getting a different cancer | | Other health problems due to cancer or treatment | |
| --- | --- | --- | --- | --- | --- | --- | --- | --- | --- | --- |
| Predictors | Adjusted OR | 95% CI | Adjusted OR | 95% CI | Adjusted OR | 95% CI | Adjusted OR | 95% CI | Adjusted OR | 95% CI |
| Round |  |  |  |  |  |  |  |  |  |  |
| 1 (referent) | 1 |  | 1 |  | 1 |  | 1 |  | 1 |  |
| 2 | 0.34*** | 0.23,0.51 | 0.50*** | 0.33,0.74 | 0.56** | 0.36,0.86 | 0.58* | 0.36,0.93 | 0.38*** | 0.24,0.60 |
| 3 | 0.33*** | 0.22,0.49 | 0.55** | 0.37,0.83 | 0.54** | 0.35,0.84 | 0.65 | 0.40,1.06 | 0.45*** | 0.29,0.70 |
| Cancer type (by gender) |  |  |  |  |  |  |  |  |  |  |
| Breast (referent) | 1 |  | 1 |  | 1 |  | 1 |  | 1 |  |
| Male colon | 0.35*** | 0.19,0.64 | 0.37** | 0.20,0.68 | 0.73 | 0.39,1.37 | 0.55 | 0.27,1.14 | 0.36** | 0.18,0.73 |
| Female colon | 0.53* | 0.30,0.96 | 0.57 | 0.32,1.01 | 1.17 | 0.65,2.12 | 0.99 | 0.51,1.92 | 0.31*** | 0.16,0.62 |
| Prostate | 0.34*** | 0.19,0.60 | 0.31*** | 0.17,0.55 | 0.59 | 0.32,1.07 | 0.48* | 0.25,0.96 | 0.45* | 0.24,0.87 |
| Round by cancer type interactions |  |  |  |  |  |  |  |  |  |  |
| Round 1, breast cancer (referent) | 1 |  | 1 |  | 1 |  | 1 |  | 1 |  |
| Round 2, male colon | 1.45 | 0.66,3.21 | 1.25 | 0.53,2.95 | 0.59 | 0.23,1.51 | 0.61 | 0.19,1.92 | 0.58 | 0.19,1.81 |
| Round 2, female colon | 1.84 | 0.90,3.74 | 1.31 | 0.62,2.78 | 2.03 | 0.97,4.24 | 1.76 | 0.76,4.04 | 3.18** | 1.36,7.41 |
| Round 2, prostate | 1.82 | 0.99,3.35 | 2.07* | 1.09,3.94 | 1.52 | 0.77,2.98 | 2.14 | 0.99,4.61 | 2.04* | 1.01,4.11 |
| Round 3, male colon | 2.57* | 1.18,5.60 | 2.25* | 1.01,5.03 | 2.24 | 0.98,5.10 | 3.49** | 1.41,8.66 | 1.83 | 0.73,4.57 |
| Round 3, female colon | 1.89 | 0.90,3.96 | 2.53* | 1.22,5.25 | 1.58 | 0.73,3.41 | 2.48* | 1.08,5.66 | 2.86* | 1.20,6.81 |
| Round 3, prostate | 1.94* | 1.05,3.59 | 2.05* | 1.08,3.90 | 1.34 | 0.67,2.67 | 1.99 | 0.92,4.27 | 1.49 | 0.73,3.04 |
| Age | 0.95*** | 0.94,0.96 | 0.96*** | 0.94,0.97 | 0.96*** | 0.94,0.97 | 0.96*** | 0.95,0.98 | 0.97*** | 0.96,0.99 |
| Race/ethnicity |  |  |  |  |  |  |  |  |  |  |
| White (referent) | 1 |  | 1 |  | 1 |  | 1 |  | 1 |  |
| African-American | 1.33 | 0.85,2.09 | 1.38 | 0.90,2.12 | 1.17 | 0.74,1.84 | 1.44 | 0.88,2.36 | 1.51 | 0.93,2.47 |
| Other | 1.63 | 0.69,3.88 | 0.94 | 0.40,2.24 | 1.09 | 0.45,2.66 | 1.7 | 0.68,4.26 | 1.37 | 0.52,3.61 |
| Education |  |  |  |  |  |  |  |  |  |  |
| Below high school (referent) | 1 |  | 1 |  | 1 |  | 1 |  | 1 |  |
| High school | 1.11 | 0.67,1.85 | 0.9 | 0.55,1.47 | 0.94 | 0.56,1.55 | 0.8 | 0.46,1.39 | 0.99 | 0.56,1.74 |
| Some college | 2.54*** | 1.47,4.37 | 1.65 | 0.98,2.77 | 1.5 | 0.88,2.56 | 1.39 | 0.77,2.50 | 2.01* | 1.10,3.67 |
| College and above | 2.91*** | 1.67,5.05 | 1.67 | 0.99,2.83 | 1.21 | 0.70,2.09 | 1.04 | 0.57,1.89 | 1.74 | 0.94,3.23 |
|  |  |  |  |  |  |  |  |  |  |  |
| Stage |  |  |  |  |  |  |  |  |  |  |
| 0-II (referent) | 1 |  | 1 |  | 1 |  | 1 |  | 1 |  |
| III | 1.06 | 0.67,1.68 | 1.47 | 0.95,2.27 | 1.19 | 0.76,1.87 | 1.01 | 0.61,1.66 | 1.44 | 0.87,2.39 |
|  |  |  |  |  |  |  |  |  |  |  |
| Marital Status |  |  |  |  |  |  |  |  |  |  |
| Not married (referent) | 1 |  | 1 |  | 1 |  | 1 |  | 1 |  |
| Married | 1.33 | 0.94,1.88 | 1.33 | 0.96,1.85 | 1.47* | 1.04,2.08 | 1.24 | 0.85,1.81 | 0.84 | 0.57,1.21 |
| Received surgery |  |  |  |  |  |  |  |  |  |  |
| No (referent) | 1 |  | 1 |  | 1 |  | 1 |  | 1 |  |
| Yes | 1.09 | 0.65,1.84 | 1.12 | 0.67,1.86 | 1.04 | 0.61,1.78 | 1.16 | 0.64,2.11 | 1.02 | 0.56,1.83 |
| Received radiation |  |  |  |  |  |  |  |  |  |  |
| No (referent) | 1 |  | 1 |  | 1 |  | 1 |  | 1 |  |
| Yes | 0.8 | 0.55,1.18 | 0.92 | 0.64,1.33 | 0.97 | 0.66,1.42 | 0.86 | 0.56,1.32 | 0.9 | 0.59,1.36 |
| Received systemic therapy (chemotherapy, hormonal, or targeted therapy) |  |  |  |  |  |  |  |  |  |  |
| No (referent) | 1 |  | 1 |  | 1 |  | 1 |  | 1 |  |
| Yes | 1.03 | 0.70,1.52 | 0.72 | 0.49,1.05 | 0.83 | 0.56,1.23 | 0.93 | 0.60,1.44 | 1.12 | 0.73,1.72 |
| Health status | 0.9 | 0.76,1.07 | 0.92 | 0.78,1.08 | 1.03 | 0.87,1.22 | 0.97 | 0.80,1.17 | 1.02 | 0.85,1.23 |
| Frequency of doctor visits | 1.13 | 0.99,1.31 | 1.12 | 0.98,1.29 | 1.31*** | 1.13,1.51 | 1.18* | 1.01,1.38 | 1.23* | 1.05,1.44 |
| Constant | 4.51 |  | 2.21 |  | 0.49 |  | 0.39 |  | 0.31 |  |

Note: *p<0.05, **p<0.01, ***p<0.0005.
